# Supplementary material for: MLUCM BEP + BEM: an offline one-dimensional multi-layer urban canopy model based on the BEP + BEM scheme
Source: Copernicus journal article supplement (doi:10.5194/gmd-18-7129-2025), 2025-10-10
Supplement: Supplementary file 1 [file gmd-18-7129-2025-supplement.pdf]

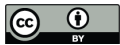

*Supplement of*

## **MLUCM BEP + BEM: an offline one-dimensional multi-layer urban canopy model based on the BEP + BEM scheme**

**Gianluca Pappaccogli et al.**

*Correspondence to:* Gianluca Pappaccogli ([gianluca.pappaccogli@unisalento.it](mailto:gianluca.pappaccogli@unisalento.it))

The copyright of individual parts of the supplement might differ from the article licence.

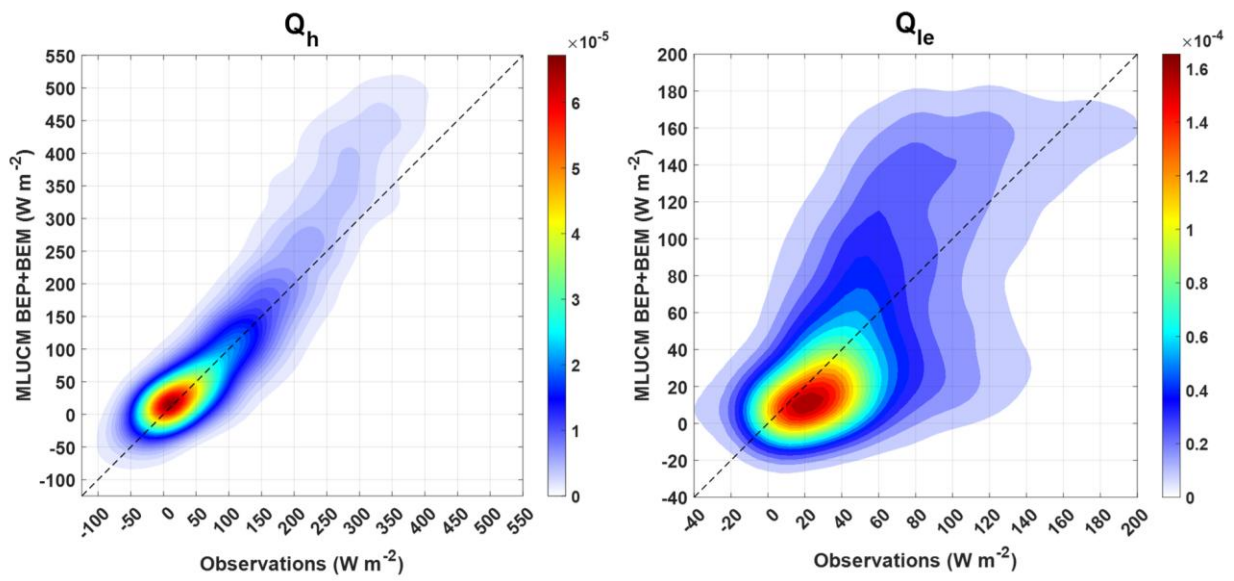

Figure S1: As in Figure 3, but during daytime (i.e. shortwave downward radiation > 10 W m<sup>-2</sup>).
